# Supplementary material for: An efficient green protocol for the synthesis of tetra-substituted imidazoles catalyzed by zeolite BEA: effect of surface acidity and polarity of zeolite
Source: Royal Society of Chemistry journal article supplement (doi:10.1039/c7cy01398a), 2017-01-01
Supplement: c7cy01398a1.pdf [file c7cy01398a1.pdf]

**An efficient green protocol for the synthesis of tetra-substituted imidazoles catalyzed by zeolite BEA: Effect of surface acidity and polarity of zeolite**

**Jenifer J. Gabla<sup>a</sup>, Sunil R. Mistry<sup>b</sup> and Kalpana C. Maheria<sup>a\*</sup>**

<sup>a</sup>Applied Chemistry Department, S. V. National Institute of Technology, Ichchhanath, Surat – 395 007, Gujarat, India

<sup>b</sup>Mandvi Science College, Mandvi – 394160, Surat, Gujarat, India

\*E-mail: [kcmaheria@gmail.com](mailto:kcmaheria@gmail.com)

---

**Supplementary Data Information**

**List of contents:**

**1. Synthesis of 1-benzyl-2, 4, 5-triphenyl-1H-imidazole (5a, n = 1):**

*Fig. 1.1. The mass spectrum of 1-benzyl-2, 4, 5-triphenyl-1H-imidazole (5a) as a model reaction*

*Fig. 1.2. The <sup>1</sup>H NMR spectrum of 1-benzyl-2, 4, 5-triphenyl-1H-imidazole (5a) as a model reaction*

*Fig. 1.3. The <sup>13</sup>C NMR spectrum of 1-benzyl-2, 4, 5-triphenyl-1H-imidazole (5a) as a model reaction*

**2. Synthesis of 1,2,4,5-tetraphenyl-1H-imidazole (5a, n = 0):**

*Fig. 2.1. The mass spectrum of 1,2,4,5-tetraphenyl-1H-imidazole (5a) as a model reaction*

*Fig. 2.2. The IR spectrum of 1,2,4,5-tetraphenyl-1H-imidazole (5a) as a model reaction*

*Fig. 2.3. The <sup>1</sup>H NMR spectrum of 1,2,4,5-tetraphenyl-1H-imidazole (5a) as a model reaction*

*Fig. 2.4. The <sup>13</sup>C NMR spectrum of 1,2,4,5-tetraphenyl-1H-imidazole (5a) as a model reaction*

**3. Synthesis of 1-benzyl-2-(4-chloro-3-nitrophenyl)-4,5-diphenyl-1H-imidazole (5h, n = 1):**

*Fig. 3.1. The mass spectrum of 1-benzyl-2-(4-chloro-3-nitrophenyl)-4,5-diphenyl-1H-imidazole (5h) as a novel imidazole derivative*

*Fig. 3.2. The IR spectrum of 1-benzyl-2-(4-chloro-3-nitrophenyl)-4,5-diphenyl-1H-imidazole (5h) as a novel imidazole derivative*

*Fig. 3.3. The <sup>1</sup>H NMR spectrum of 1-benzyl-2-(4-chloro-3-nitrophenyl)-4,5-diphenyl-1H-imidazole (5h) as a novel imidazole derivative*

*Fig. 3.4. The <sup>13</sup>C NMR spectrum of 1-benzyl-2-(4-chloro-3-nitrophenyl)-4,5-diphenyl-1H-imidazole (5h) as a novel imidazole derivative*

#### **4. Synthesis of 2-(4-chloro-3-nitrophenyl)-1,4,5-triphenyl-1H-imidazole (5h, n = 0):**

*Fig. 3.1. The mass spectrum of 2-(4-chloro-3-nitrophenyl)-1,4,5-triphenyl-1H-imidazole (5h) as a novel imidazole derivative*

*Fig. 3.2. The IR spectrum of 2-(4-chloro-3-nitrophenyl)-1,4,5-triphenyl-1H-imidazole (5h) as a novel imidazole derivative*

*Fig. 3.3. The <sup>1</sup>H NMR spectrum of 2-(4-chloro-3-nitrophenyl)-1,4,5-triphenyl-1H-imidazole (5h) as a novel imidazole derivative*

*Fig. 3.4. The <sup>13</sup>C NMR spectrum of 2-(4-chloro-3-nitrophenyl)-1,4,5-triphenyl-1H-imidazole (5h) as a novel imidazole derivative*

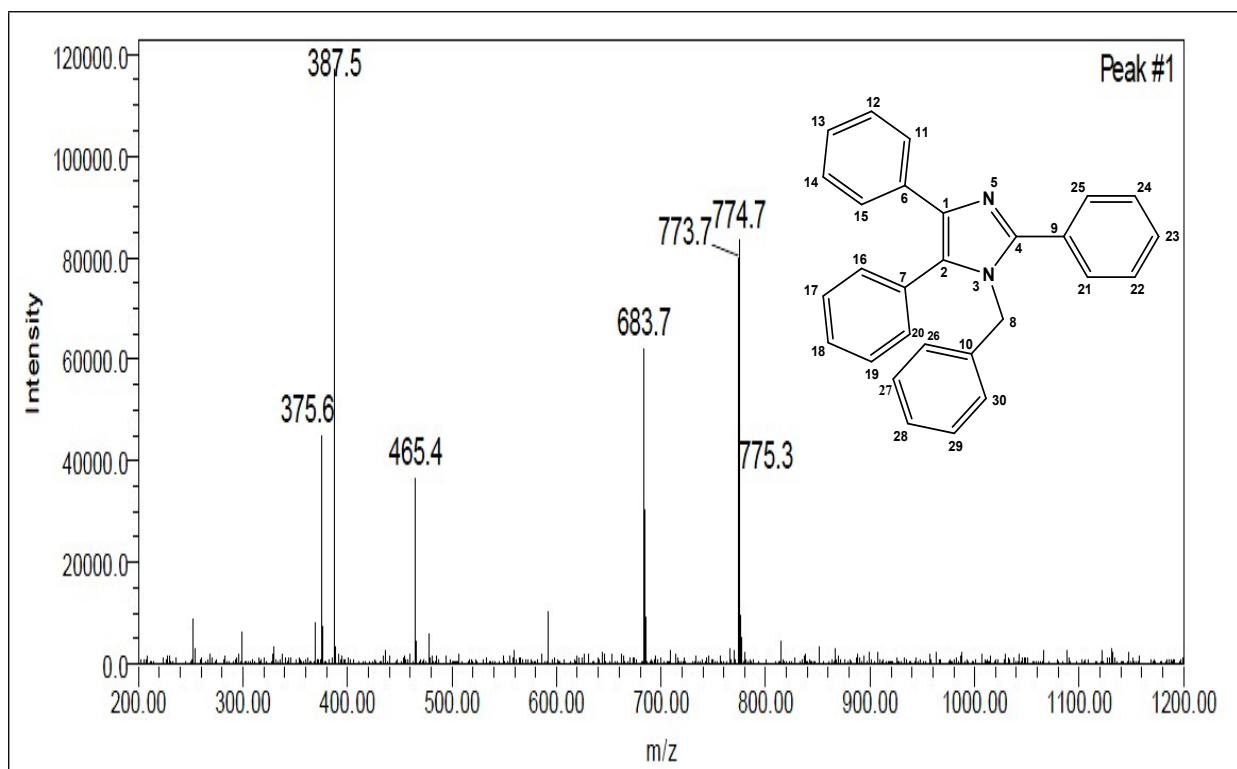

**Fig. 1.1.** Mass spectrum of 1-benzyl-2,4,5-triphenyl-1H-imidazole (5a, n = 1)

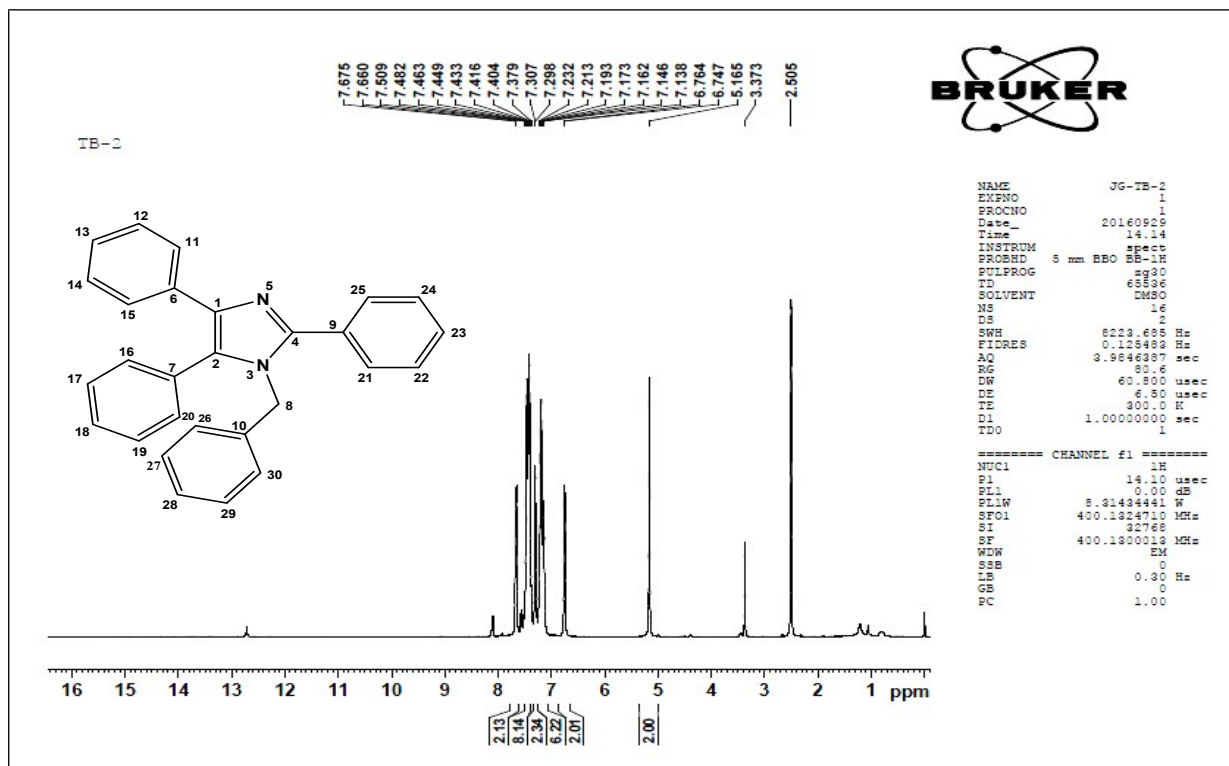

**Fig. 1.2.** <sup>1</sup>H NMR spectrum of 1-benzyl-2,4,5-triphenyl-1H-imidazole (5a, n = 1)

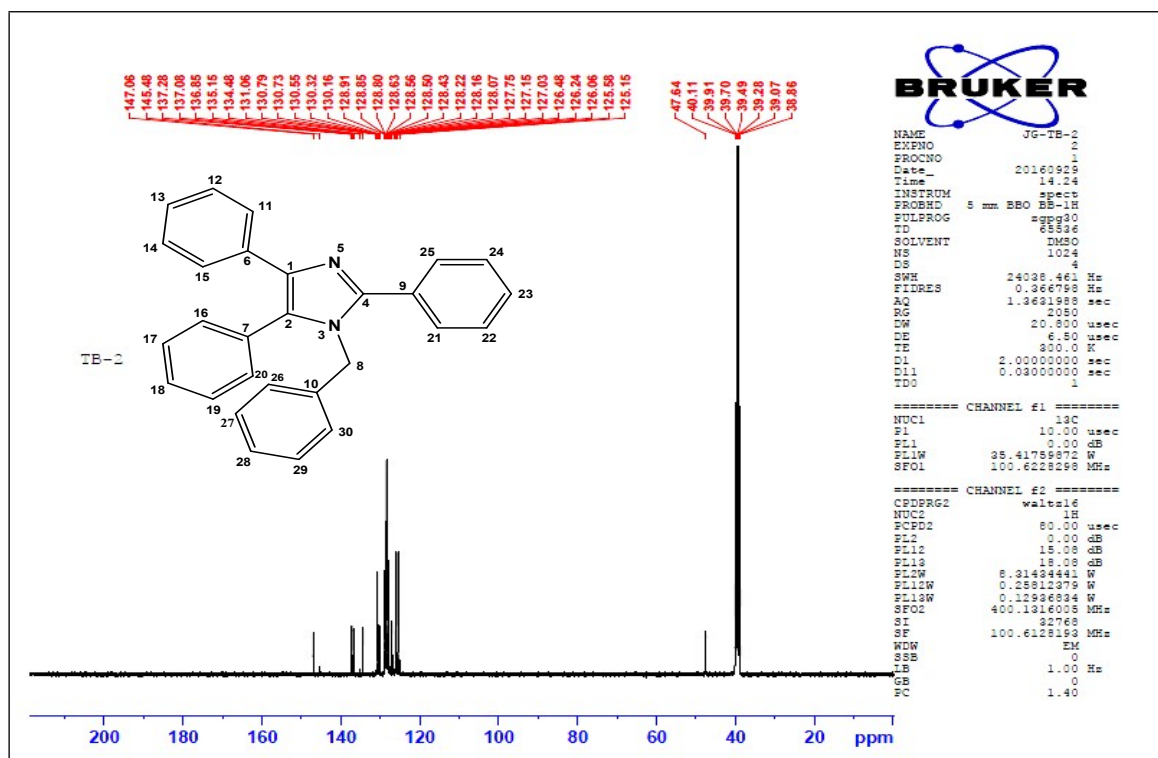

**Fig. 1.3.**  $^{13}\text{C}$  NMR spectrum of 1-benzyl-2,4,5-triphenyl-1*H*-imidazole (5a, n = 1)

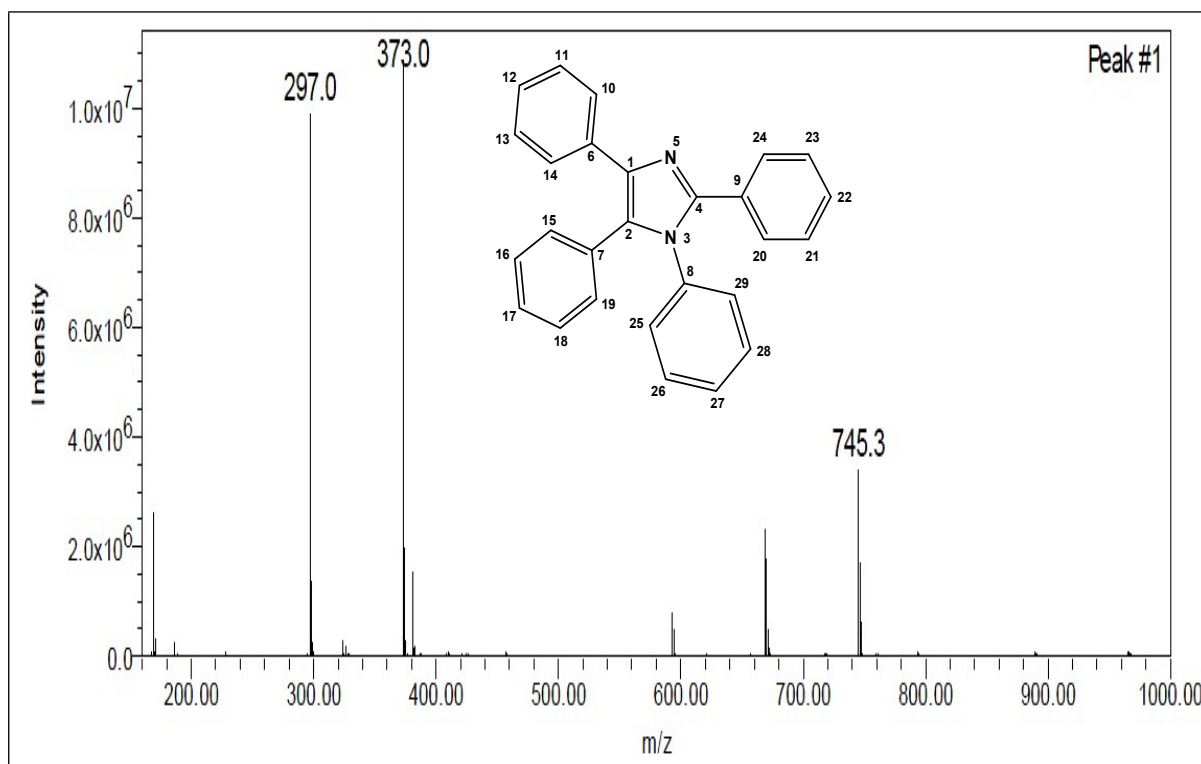

**Fig 2.1.** Mass spectrum of 1,2,4,5-tetraphenyl-1*H*-imidazole (5a, n = 0)

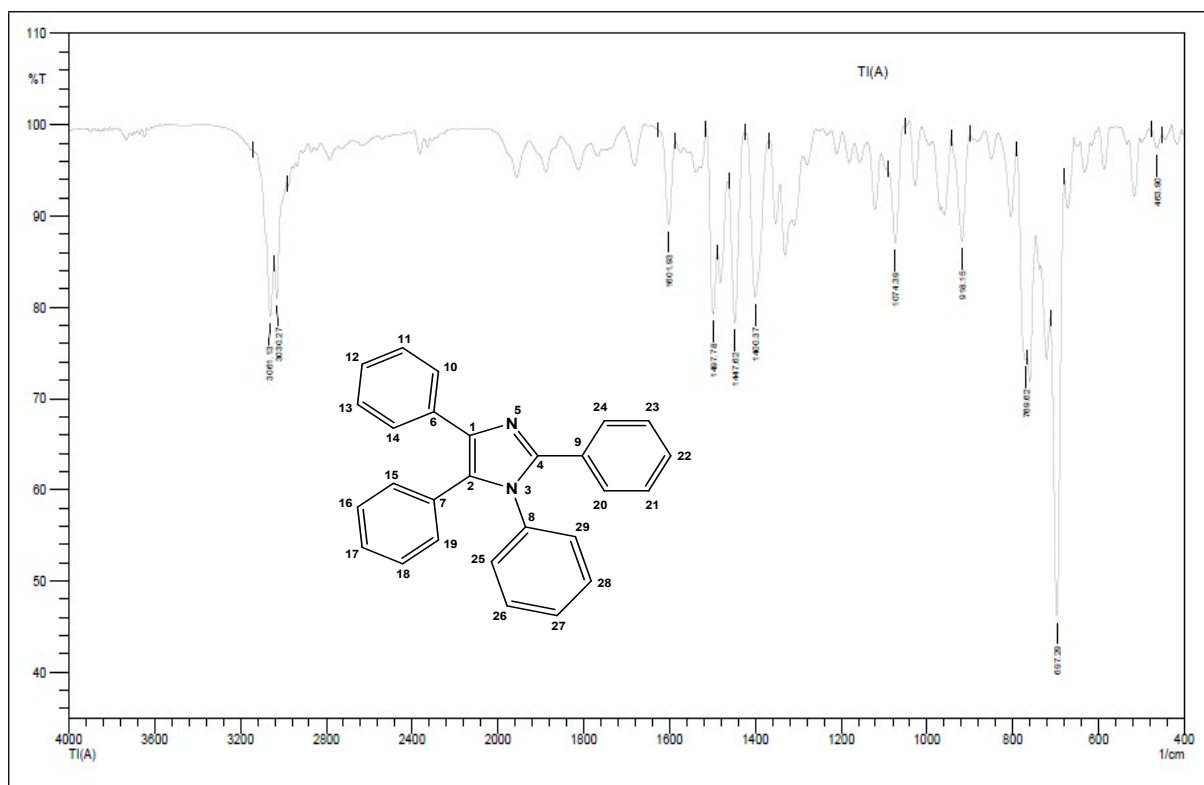

Fig. 2.2. IR spectrum of 1,2,4,5-tetraphenyl-1H-imidazole (5a, n = 0)

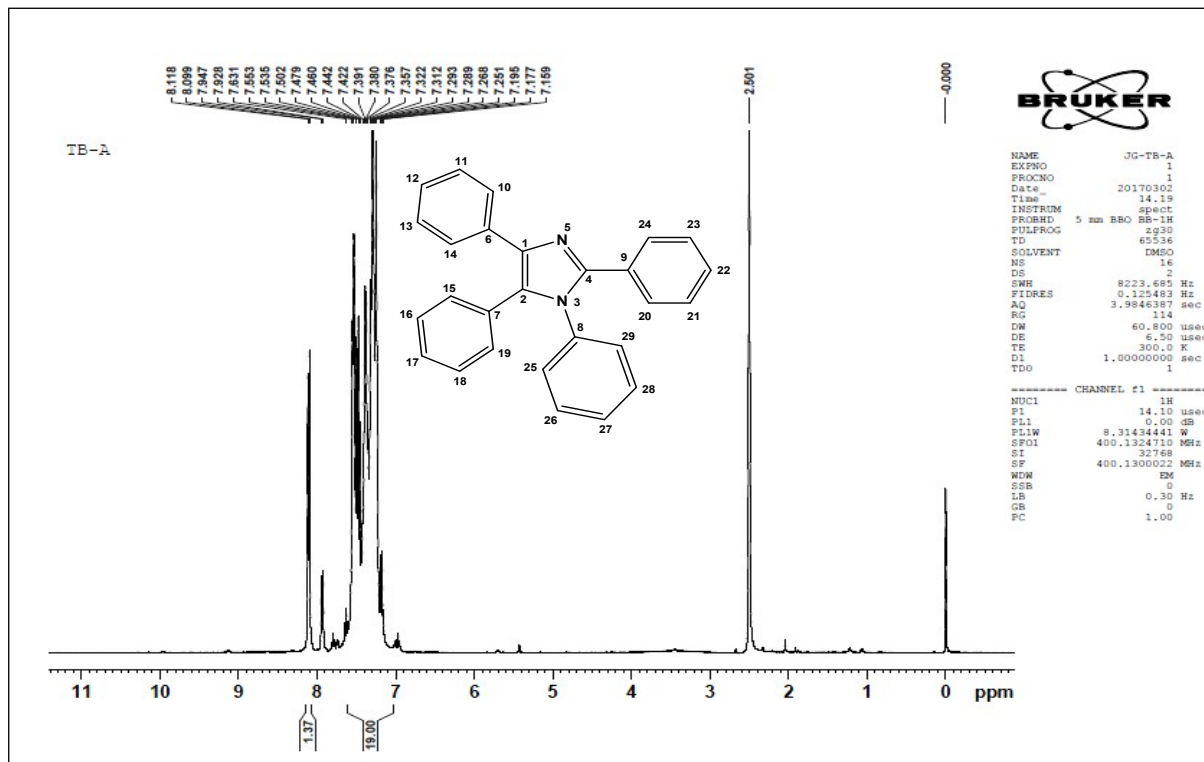

Fig. 2.3. <sup>1</sup>H NMR spectrum of 1,2,4,5-tetraphenyl-1H-imidazole (5a, n = 0)

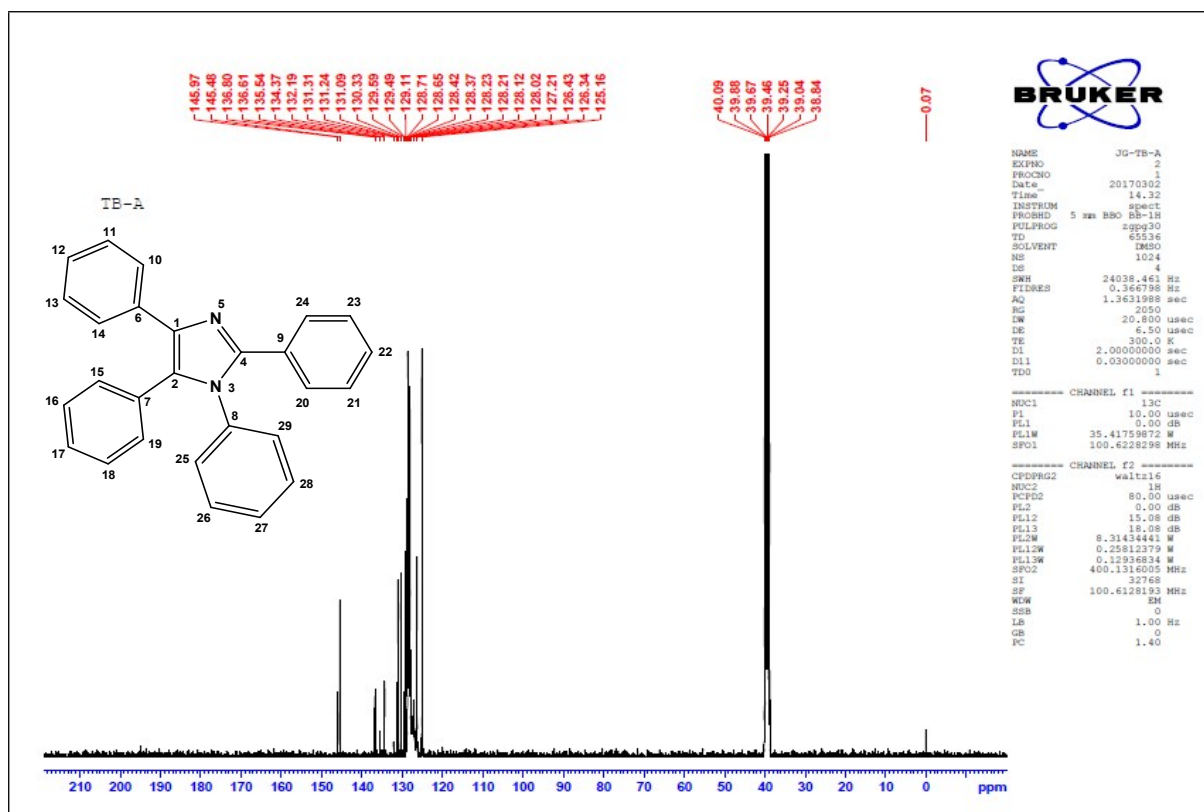

Fig. 2.4.  $^{13}\text{C}$  NMR spectrum of 1,2,4,5-tetraphenyl-1H-imidazole (5a, n = 0)

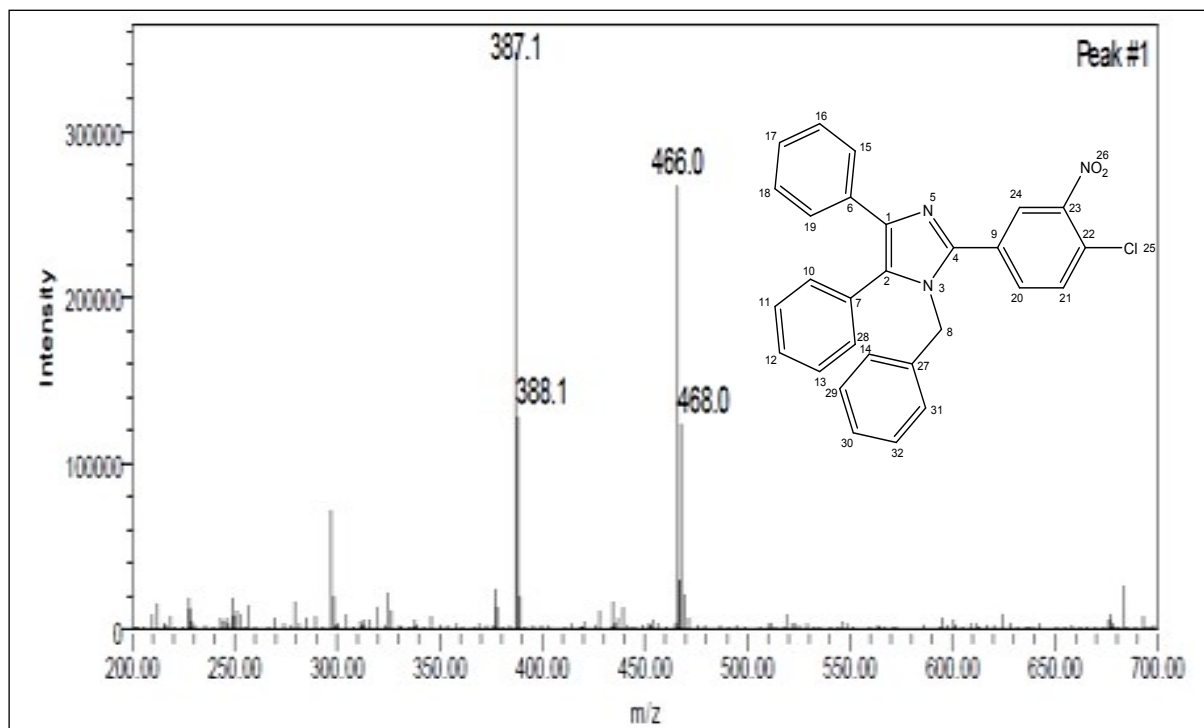

Fig. 3.1. Mass spectrum of 1-benzyl-2-(4-chloro-3-nitrophenyl)-4,5-diphenyl-1H-imidazole (5h, n = 1)

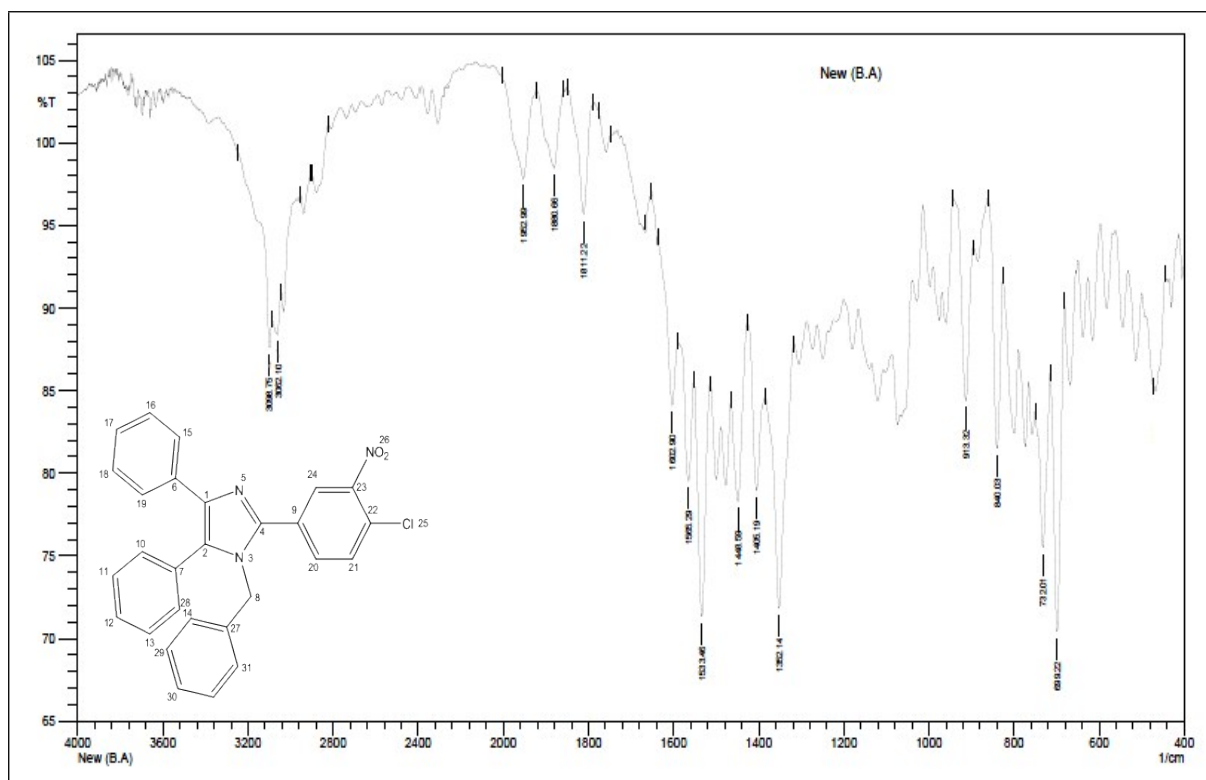

**Fig. 3.2.** IR spectrum of 1-benzyl-2-(4-chloro-3-nitrophenyl)-4,5-diphenyl-1H-imidazole (5h, n = 1)

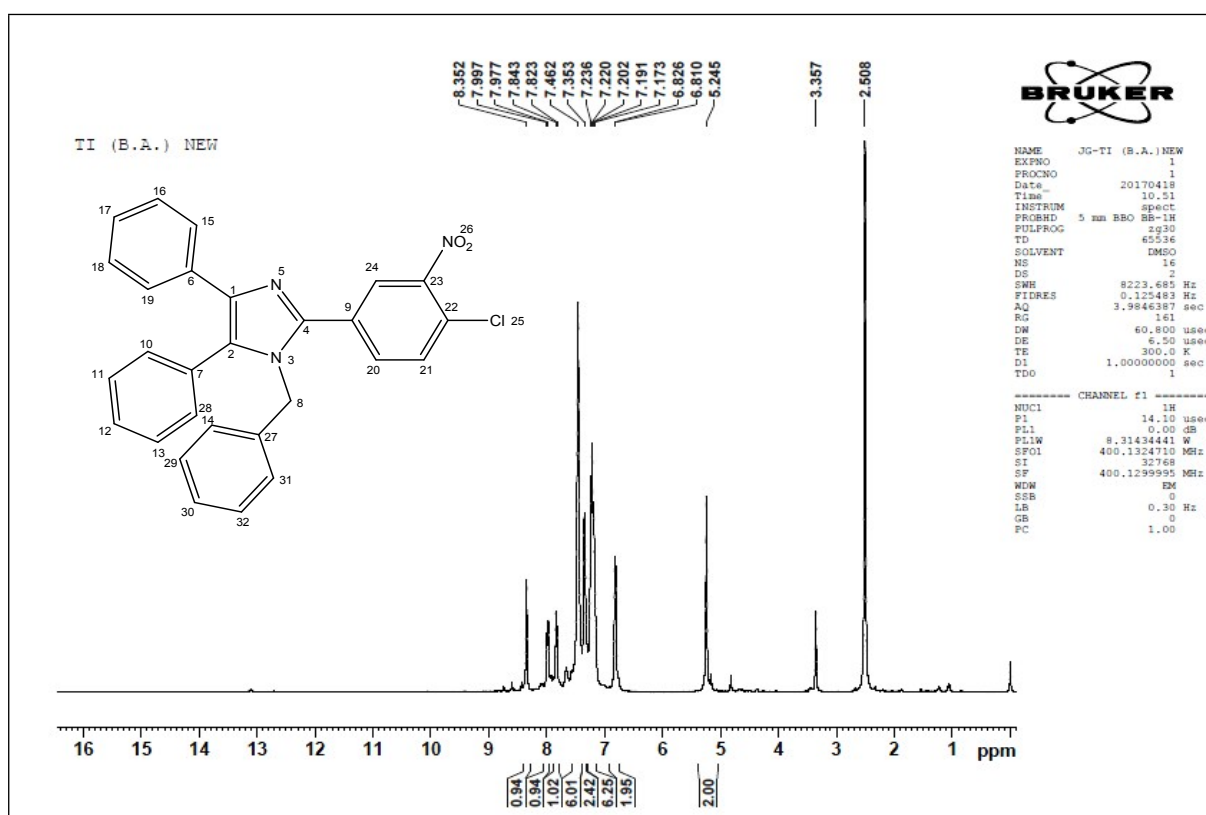

**Fig. 3.3.** <sup>1</sup>H NMR spectrum of 1-benzyl-2-(4-chloro-3-nitrophenyl)-4,5-diphenyl-1H-imidazole (5h, n = 1)

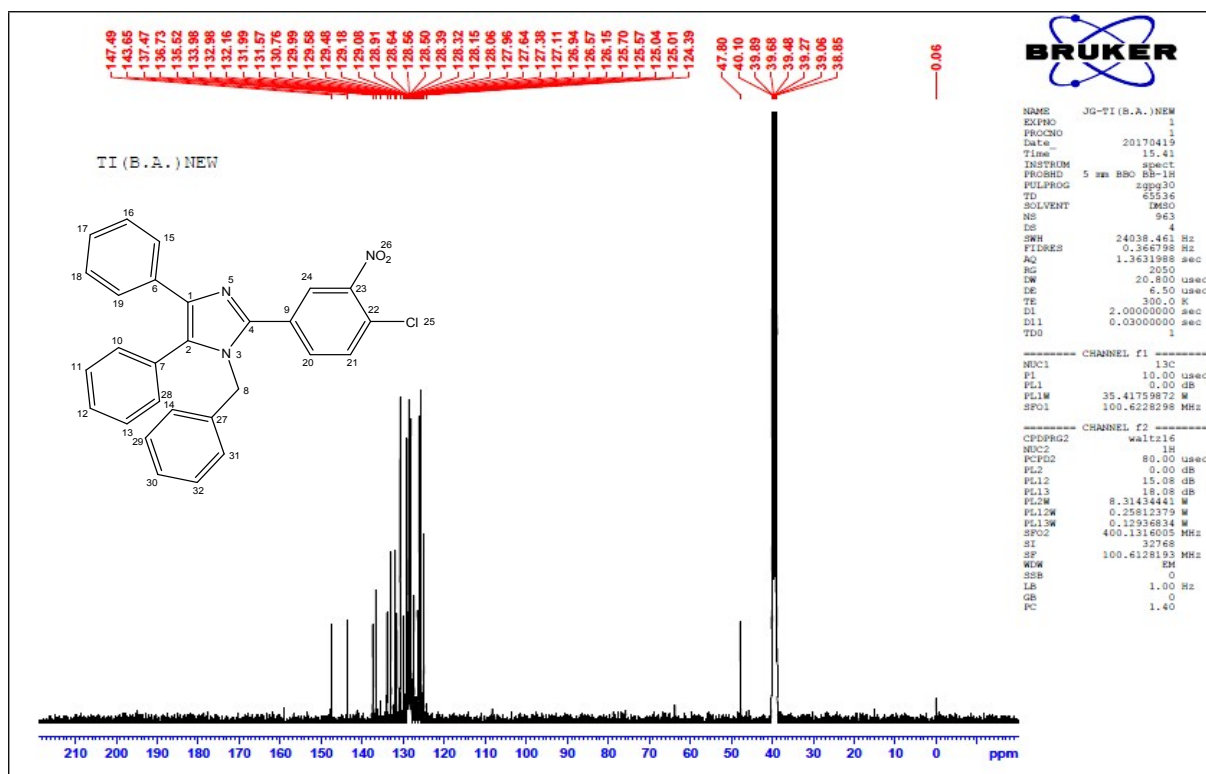

**Fig. 3.4.**  $^{13}\text{C}$  NMR spectrum of 1-benzyl-2-(4-chloro-3-nitrophenyl)-4,5-diphenyl-1H-imidazole (5h, n = 1)

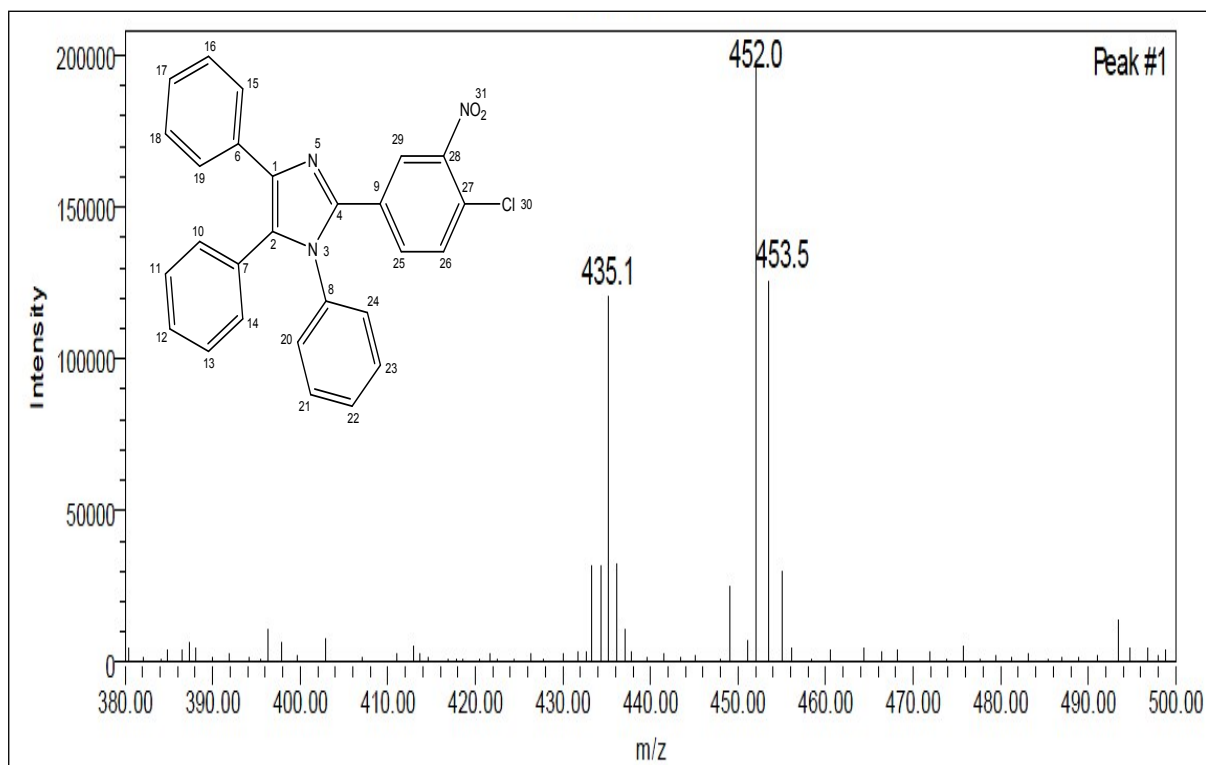

**Fig. 4.1.** Mass spectrum of 2-(4-chloro-3-nitrophenyl)-1,4,5-triphenyl-1H-imidazole (5h, n = 0)



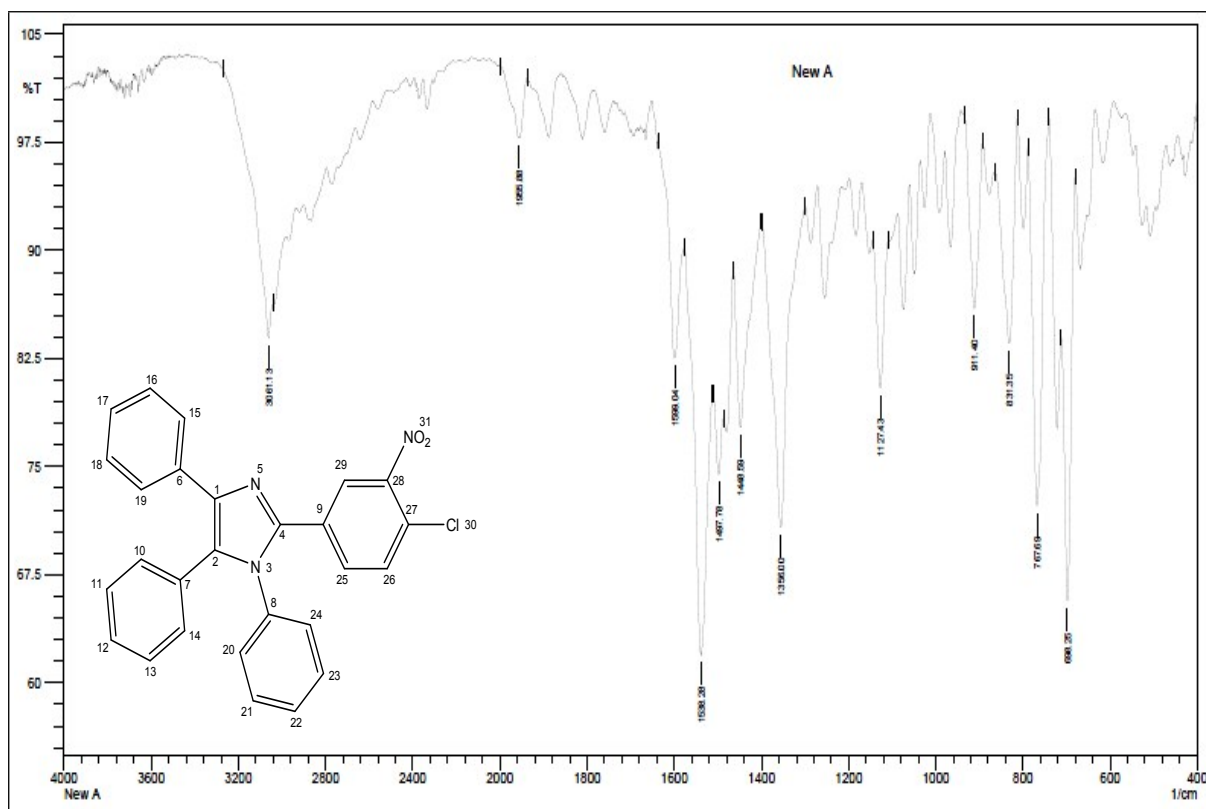

Fig. 4.2. IR spectrum of 2-(4-chloro-3-nitrophenyl)-1,4,5-triphenyl-1H-imidazole (5h, n = 0)

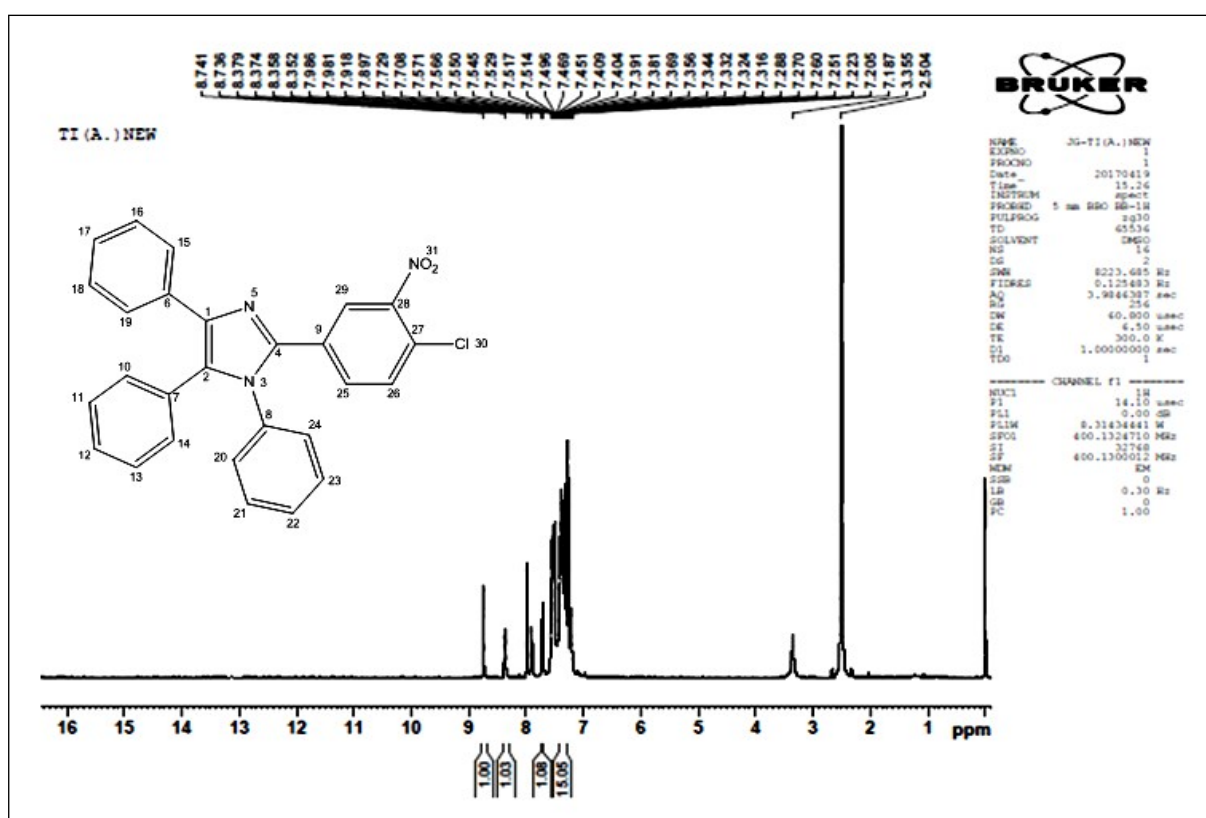

Fig. 4.3. <sup>1</sup>H NMR spectrum of 2-(4-chloro-3-nitrophenyl)-1,4,5-triphenyl-1H-imidazole (5h, n = 0)

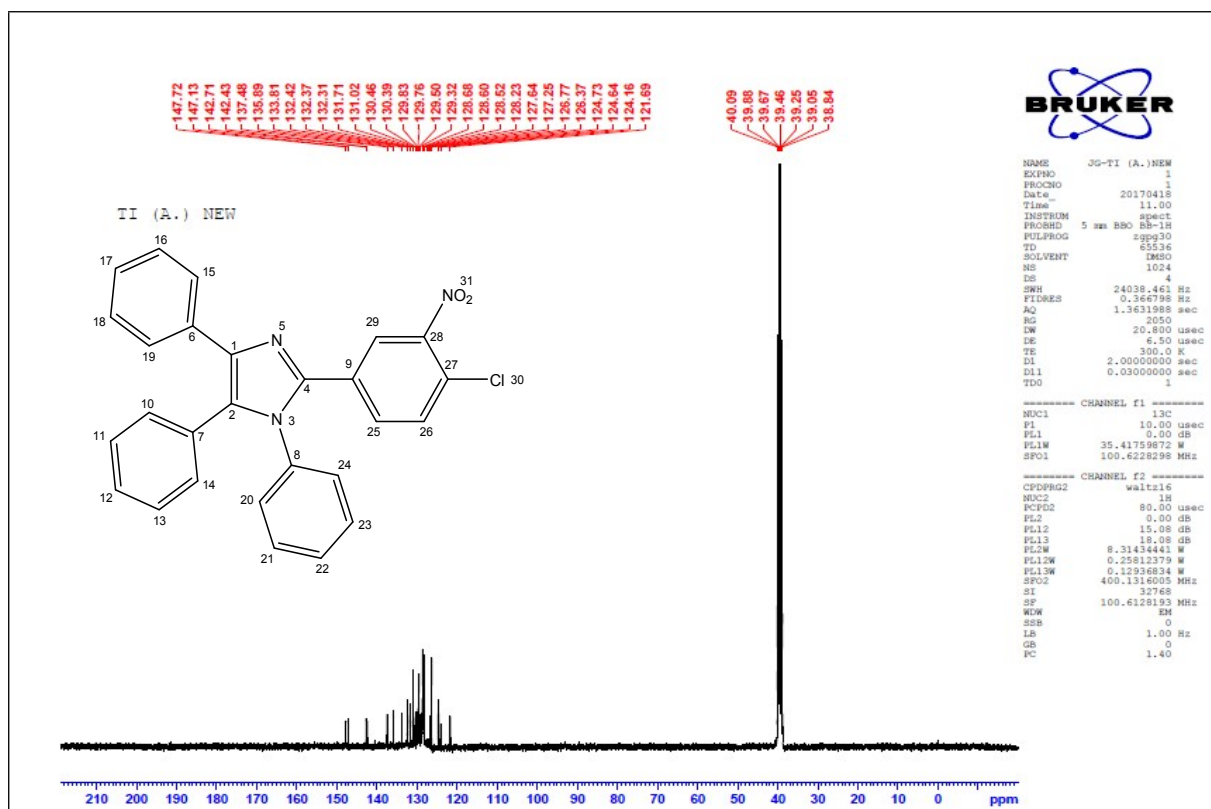

**Fig. 4.4.** <sup>13</sup>C NMR spectrum of 2-(4-chloro-3-nitrophenyl)-1,4,5-triphenyl-1H-imidazole (5h, n = 0)
